# Supplementary material for: Physical Activity in 6.5-Year-Old Children Born Extremely Preterm
Source: MDPI journal article supplement (doi:10.3390/jcm9103206), 2020-10-04
Supplement: s1 [file s1]

**Percentage of time in 10 levels of PA, comparison index vs controls, stratified on sex.**

|                 | males                  |                           |                          | females                |                           |       |
|-----------------|------------------------|---------------------------|--------------------------|------------------------|---------------------------|-------|
|                 | index<br>mean (95% CI) | controls<br>mean (95% CI) | p                        | index<br>mean (95% CI) | controls<br>mean (95% CI) | p     |
| In cut point 1  | 62.7 (59.7, 65.6)      | 57.2 (54.7, 59.7)         | <b>0.011</b>             | 57.5 (54.8, 60.2)      | 59.8 (57.1, 62.4)         | 0.263 |
| In cut point 2  | 27.4 (25.5, 29.4)      | 29.0 (27.4, 30.6)         | 0.255                    | 31.1 (29.4, 32.8)      | 29.8 (28.2, 31.5)         | 0.316 |
| In cut point 3  | 7.0 (6.0, 8.0)         | 9.2 (8.3, 10.0)           | <b>0.002</b>             | 8.3 (7.4, 9.3)         | 7.5 (6.6, 8.4)            | 0.251 |
| In cut point 4  | 1.9 (1.4, 2.5)         | 3.0 (2.5, 3.5)            | <b>0.007</b>             | 2.0 (1.6, 2.3)         | 1.9 (1.6, 2.2)            | 0.819 |
| In cut point 5  | 0.7 (0.4, 1.0)         | 1.1 (0.8, 1.3)            | 0.068                    | 0.7 (0.5, 0.9)         | 0.6 (0.5, 0.8)            | 0.765 |
| In cut point 6  | 0.2 (0.1, 0.4)         | 0.4 (0.3, 0.5)            | 0.114                    | 0.2, (0.1, 0.3)        | 0.2, (0.1, 0.3)           | 0.629 |
| In cut point 7  | 0.0 (-0.0, 0.1)        | 0.1 (0.1, 0.2)            | <b>0.036<sup>#</sup></b> | 0.1 (0.0, 0.2)         | 0.0 (0.0, 0.1)            | 0.443 |
| In cut point 8  | 0.0 (-0.0, 0.0)        | 0.0 (0.0, 0.0)            | <b>0.023</b>             | 0.0 (-0.0, 0.1)        | 0.0 (-0.0, 0.1)           | 0.820 |
| In cut point 9  | 0.0 (-0.0, 0.0)        | 0.0 (0.0, 0.0)            | 0.144                    | 0.0 (-0.0, 0.0)        | 0.0 (-0.0, 0.0)           | 0.711 |
| In cut point 10 | 0.0 (-0.0, 0.0)        | 0.0 (-0.0, 0.0)           | 0.853                    | 0.0 (-0.0, 0.0)        | 0.0 (0.0, 0.0)            | 0.083 |

PA- Physical Activity, index - children born extremely preterm, control - children born at term. All differences from cut-point 4 and above were additionally tested for significance with the Mann-Whitney U-test, since not normally distributed. <sup>#</sup>not significant in Mann-whitney U-test.
